# Supplementary material for: Effect of solution pH on the performance of three electrolytic advanced oxidation processes for the treatment of textile wastewater and sludge characteristics
Source: Royal Society of Chemistry journal article supplement (doi:10.1039/c4ra02958e), 2014-01-01
Supplement: c4ra02958e1.pdf [file c4ra02958e1.pdf]

## Effect of solution pH on the performance of three electrolytic advanced oxidation processes for the treatment of textile wastewater and sludge characteristics

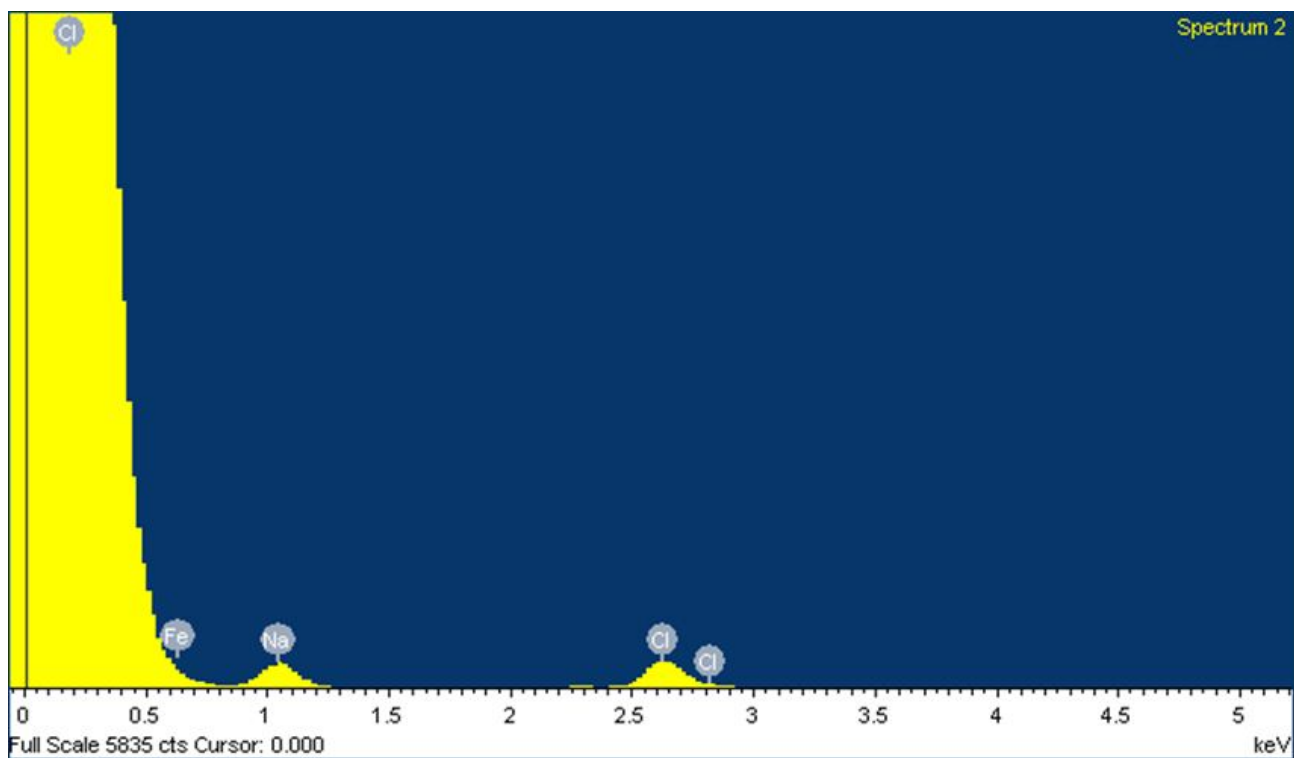

**Fig. S1** EDS spectra of the sludge
